# Supplementary material for: Linkage mapping in the oilseed crop Jatropha curcas L. reveals a locus controlling the biosynthesis of phorbol esters which cause seed toxicity
Source: PubMed Central journal article supplement (PMC4274016; doi:10.1111/pbi.12092), 2013-07-30

# Supplementary File 5 – Single and integrated maps

## Linkage Group 1

integrated

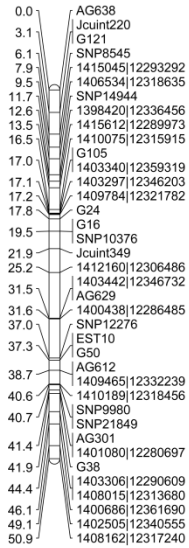

QV-JAT03 x  
QV-JAT02

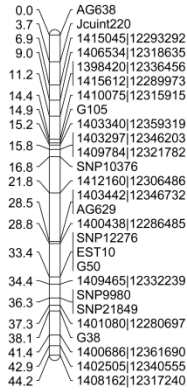

QV-JAT02 x  
QV-JAT01

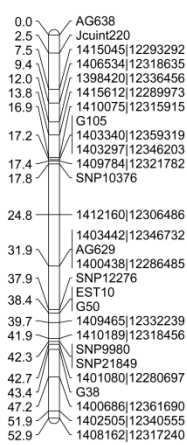

G33 x G43

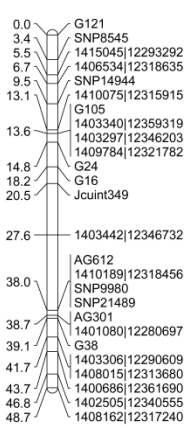

G51 x CV

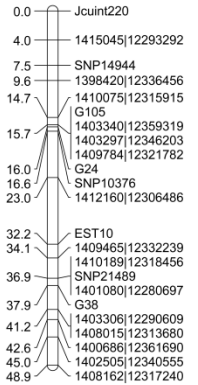

## Linkage Group 2

integrated

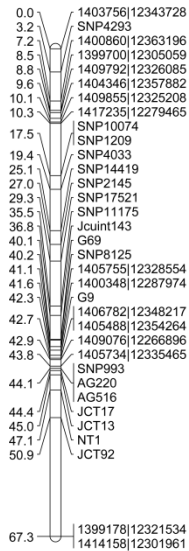

QV-JAT03 x  
QV-JAT02

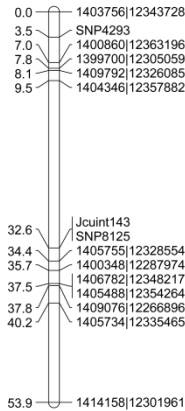

QV-JAT02 x  
QV-JAT01

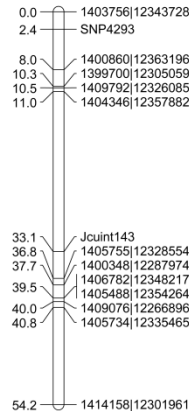

G33 x G43

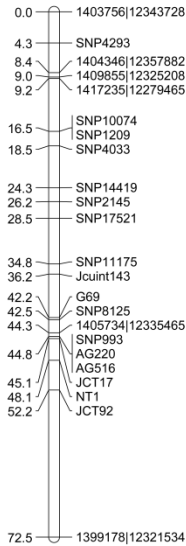

G51 x CV

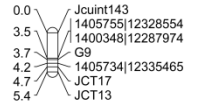



Supplementary File 5 continued – Single and integrated maps

Linkage Group 5

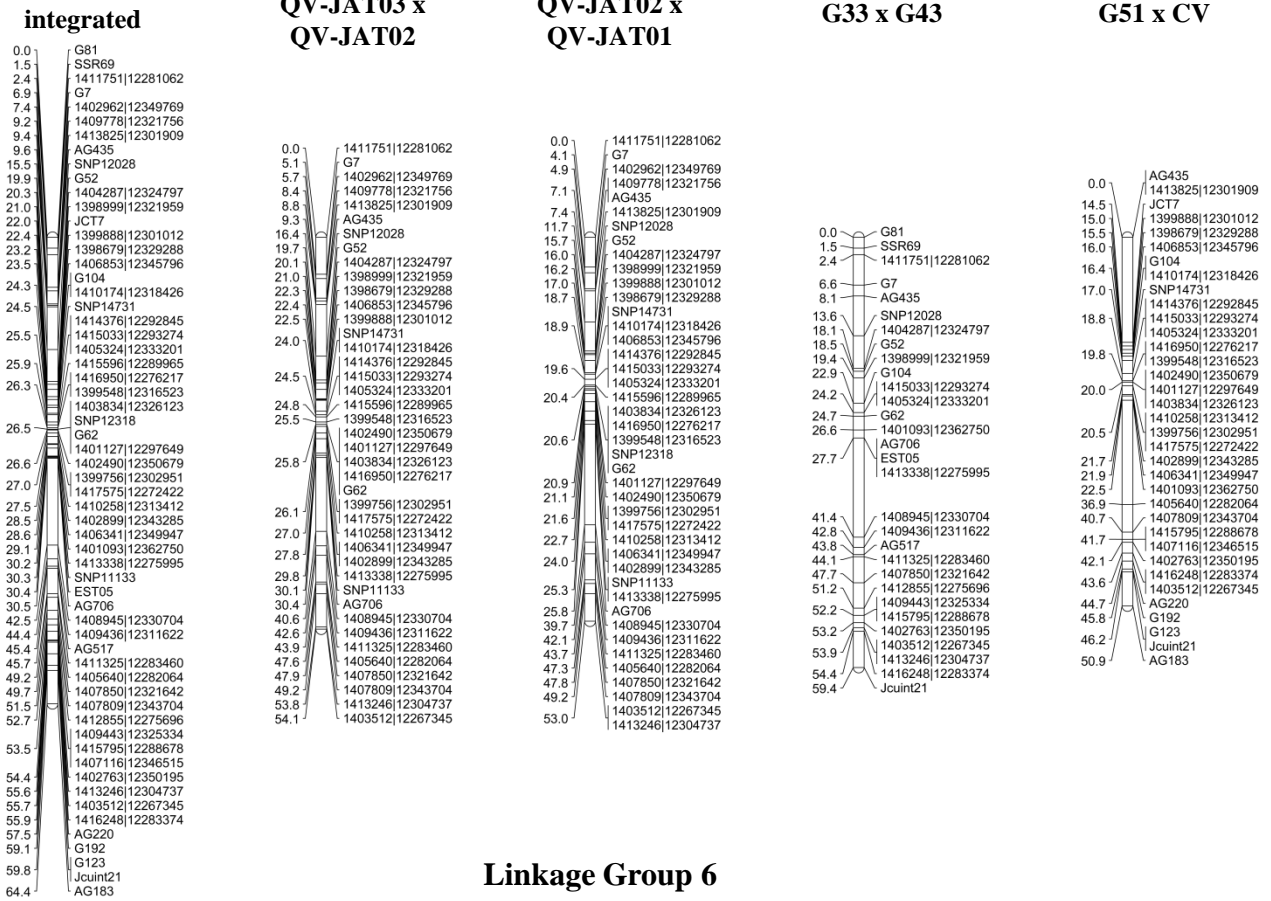

Linkage Group 6

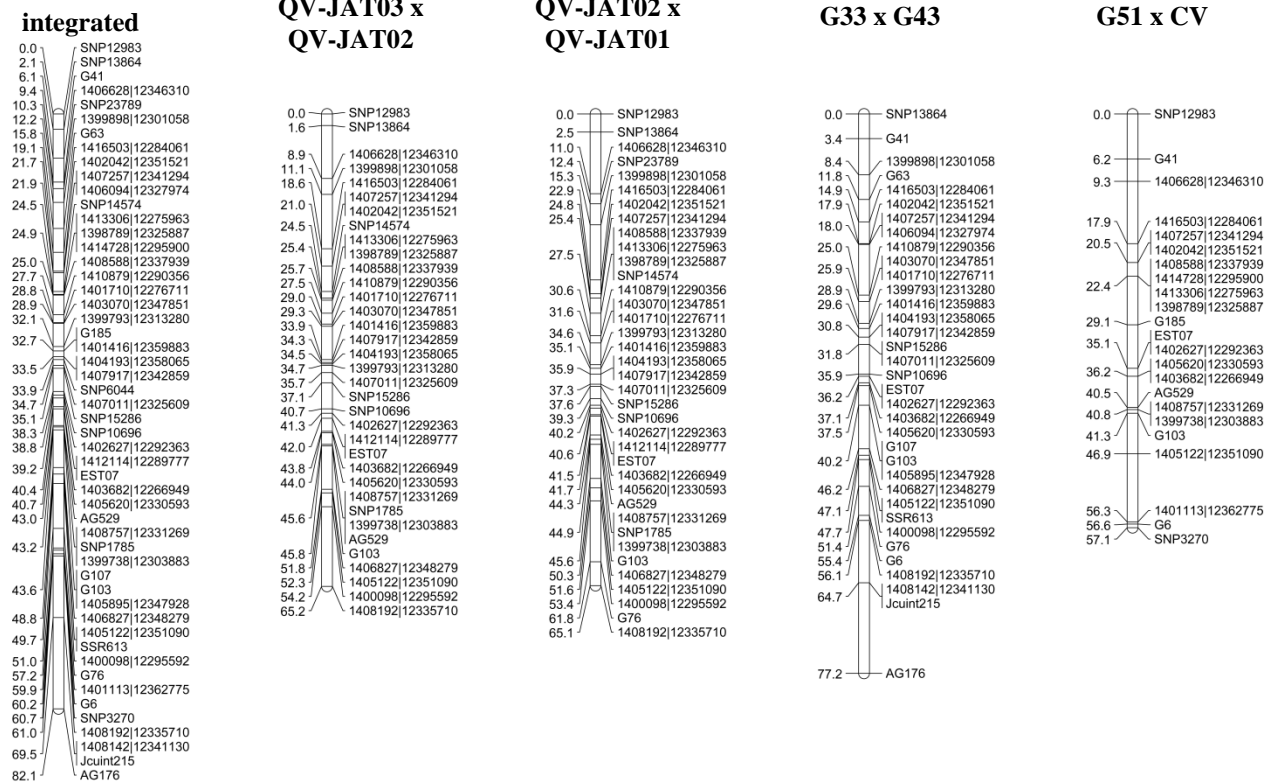

# Supplementary File 5 continued – Single and integrated maps

## Linkage Group 7

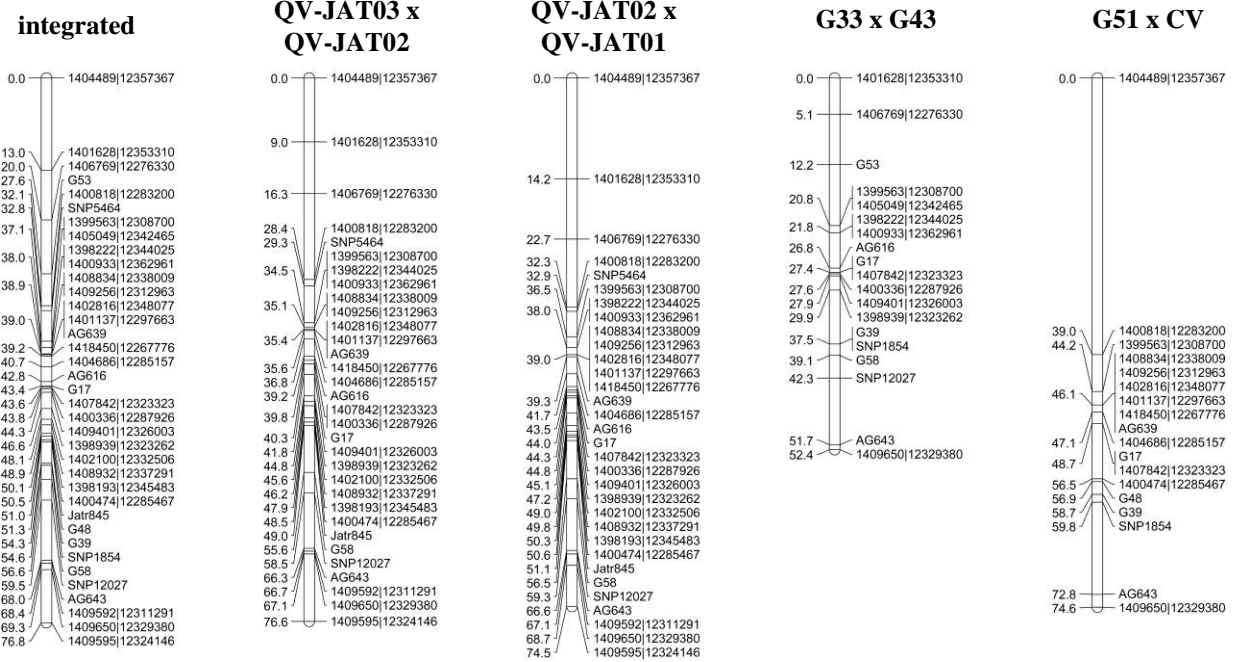

## Linkage Group 8

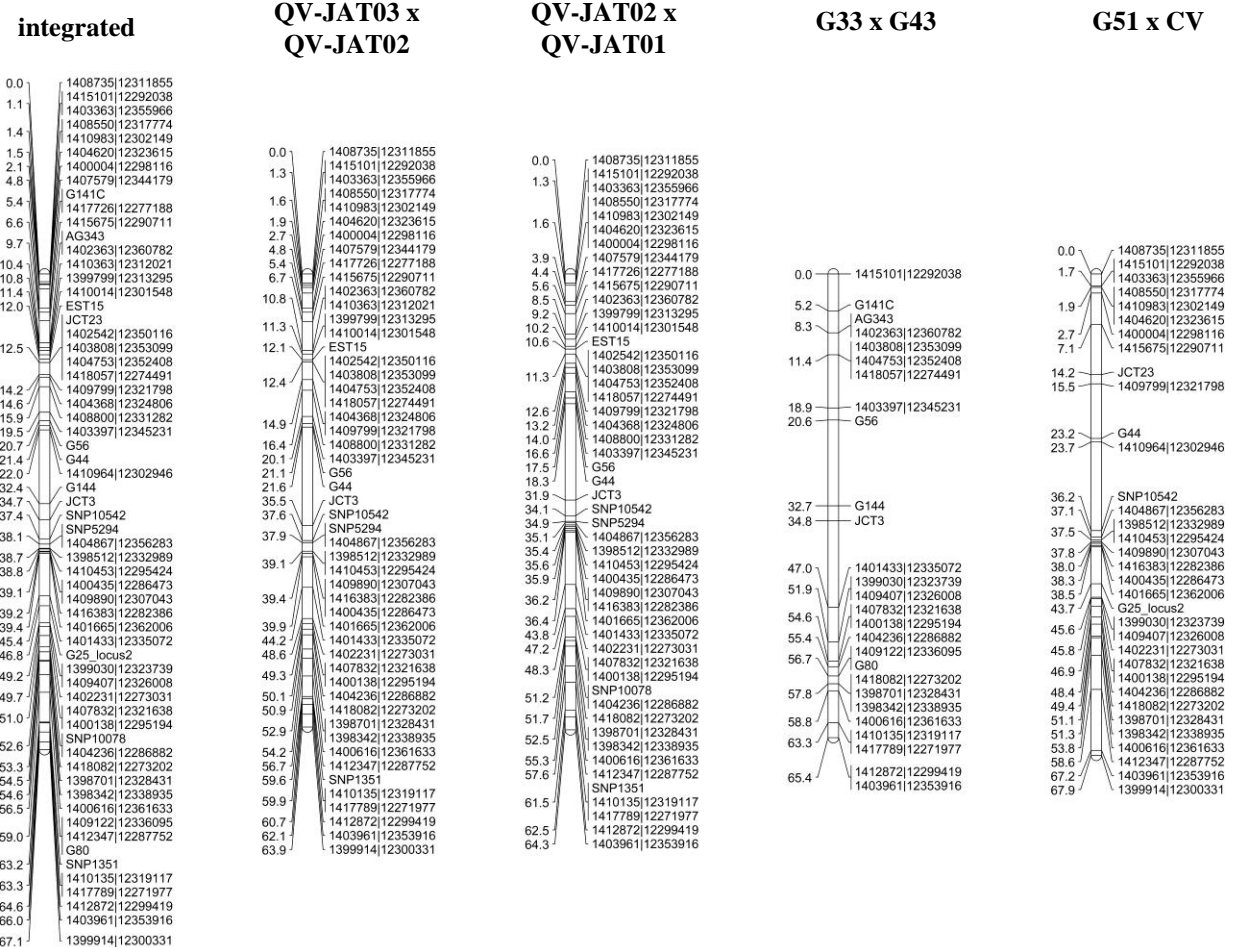

# Supplementary File 5 continued – Single and integrated maps

## Linkage Group 9

### integrated

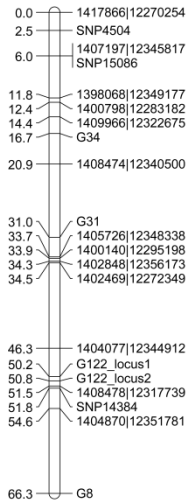

### QV-JAT03 x QV-JAT02

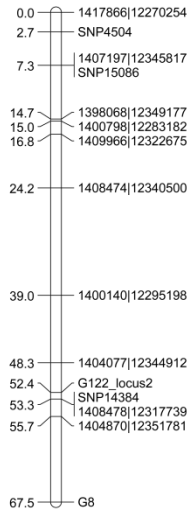

### QV-JAT02 x QV-JAT01

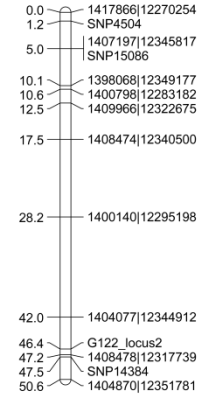

### G33 x G43

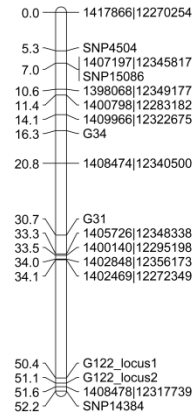

### G51 x CV

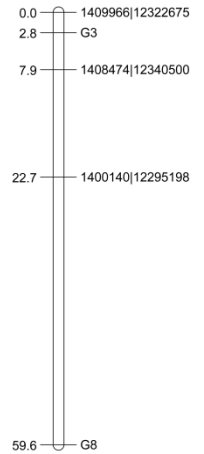

## Linkage Group 10

### integrated

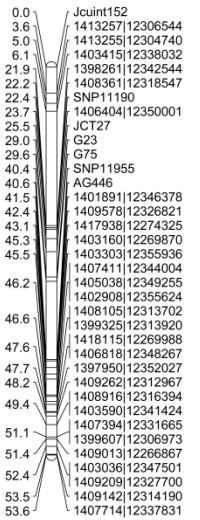

### QV-JAT03 x QV-JAT02

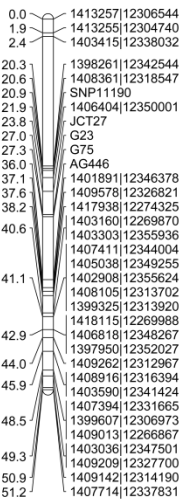

### QV-JAT02 x QV-JAT01

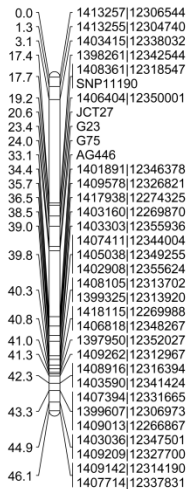

### G33 x G43

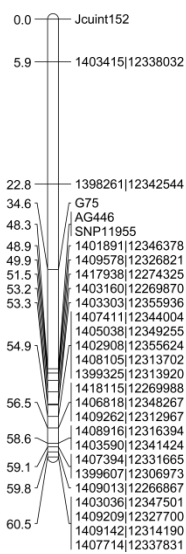

### G51 x CV

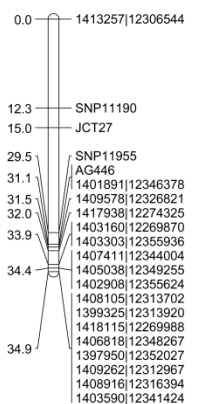

# Supplementary File 5 continued – Single and integrated maps

## Linkage Group 11

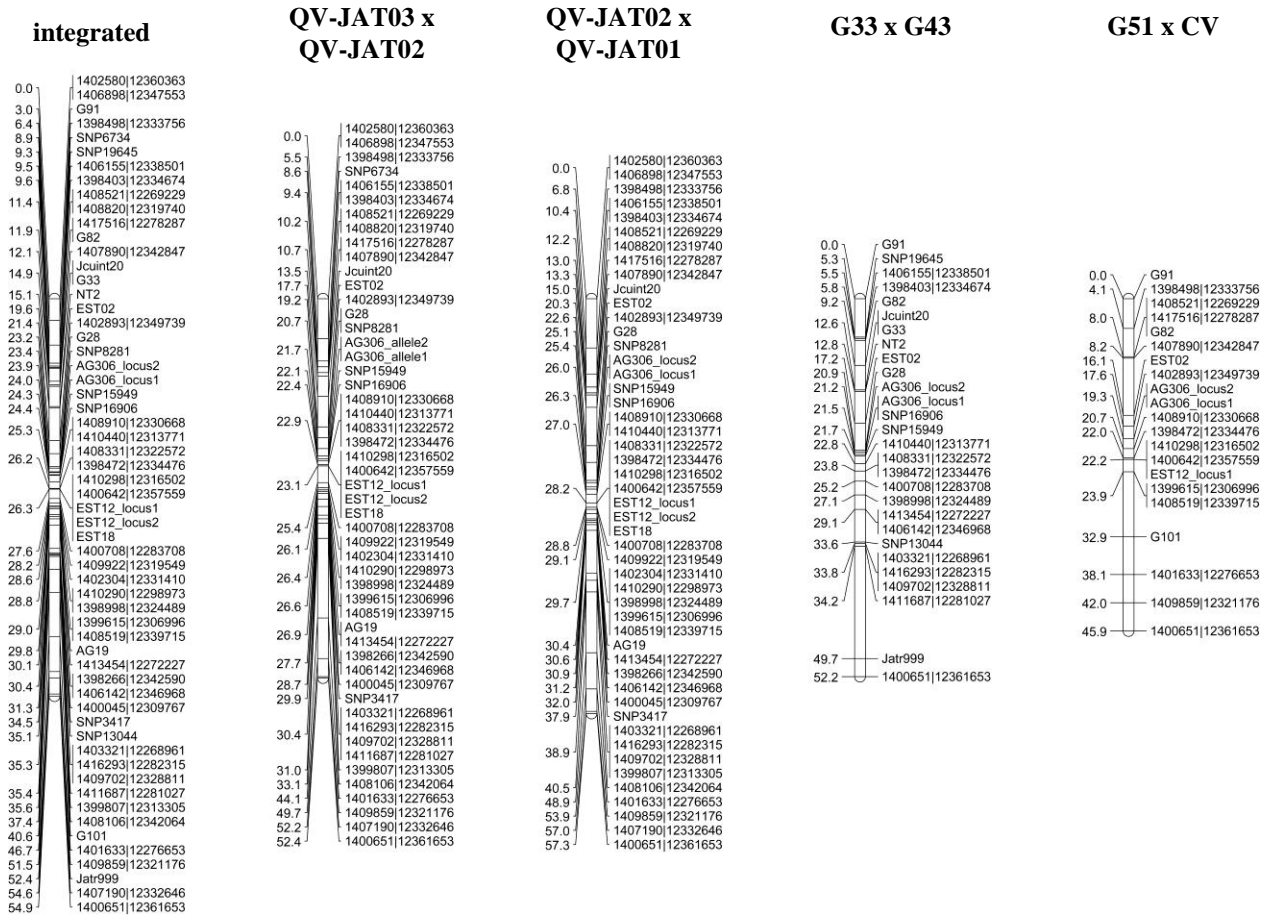

Supplement: pbi0011-0986-sd5.pdf [file pbi0011-0986-sd5.pdf]
